# Supplementary material for: Trafficking of the exported P. falciparum chaperone PfHsp70x
Source: PubMed Central journal article supplement (PMC5099922; doi:10.1038/srep36174), 2016-11-08
Supplement: srep36174-s1.pdf [file srep36174-s1.pdf]

Trafficking of the exported *P. falciparum* chaperone PfHsp70x.

Manuel Rhiel<sup>1, 2</sup>, Verena Bittl<sup>1</sup>, Anke Tribensky<sup>1</sup>, Sarah C Charnaud<sup>3, 4</sup>, Maja Strecker<sup>1</sup>, Sebastian Müller<sup>1</sup>, Michael Lanzer<sup>5</sup>, Cecilia Sanchez<sup>5</sup>, Christine Schaeffer-Reiss<sup>6</sup>, Benoit Westermann<sup>6</sup>, Brendan S Crabb<sup>3, 4, 7</sup>, Paul R Gilson<sup>3, 4</sup>, Simone Külzer<sup>1, 8</sup>, and Jude M Przyborski<sup>1\*</sup>

## Legends to Supplementary Material

### **Supplementary Figure S1. Trafficking of KAHRP and SBP1 is blocked upon inactivation of PTEX.**

DIC, differential interference contrast; in merge and overlay blue, Hoechst (nuclear stain); green, GFP; red, specific antibody staining. Pictures are representative of at least 10 individual observations.

### **Supplementary Table S2. Oligonucleotides and cloning strategy**

Trafficking of the exported *P. falciparum* chaperone PfHsp70x.

Manuel Rhiel<sup>1,2</sup>, Verena Bittl<sup>1</sup>, Anke Tribensky<sup>1</sup>, Sarah C Charnaud<sup>3,4</sup>, Maja Strecker<sup>1</sup>, Sebastian Müller<sup>1</sup>, Michael Lanzer<sup>5</sup>, Cecilia Sanchez<sup>5</sup>, Christine Schaeffer-Reiss<sup>6</sup>, Benoit Westermann<sup>6</sup>, Brendan S Crabb<sup>3,4,7</sup>, Paul R Gilson<sup>3,4</sup>, Simone Külzer<sup>1,8</sup>, and Jude M Przyborski<sup>1\*</sup>

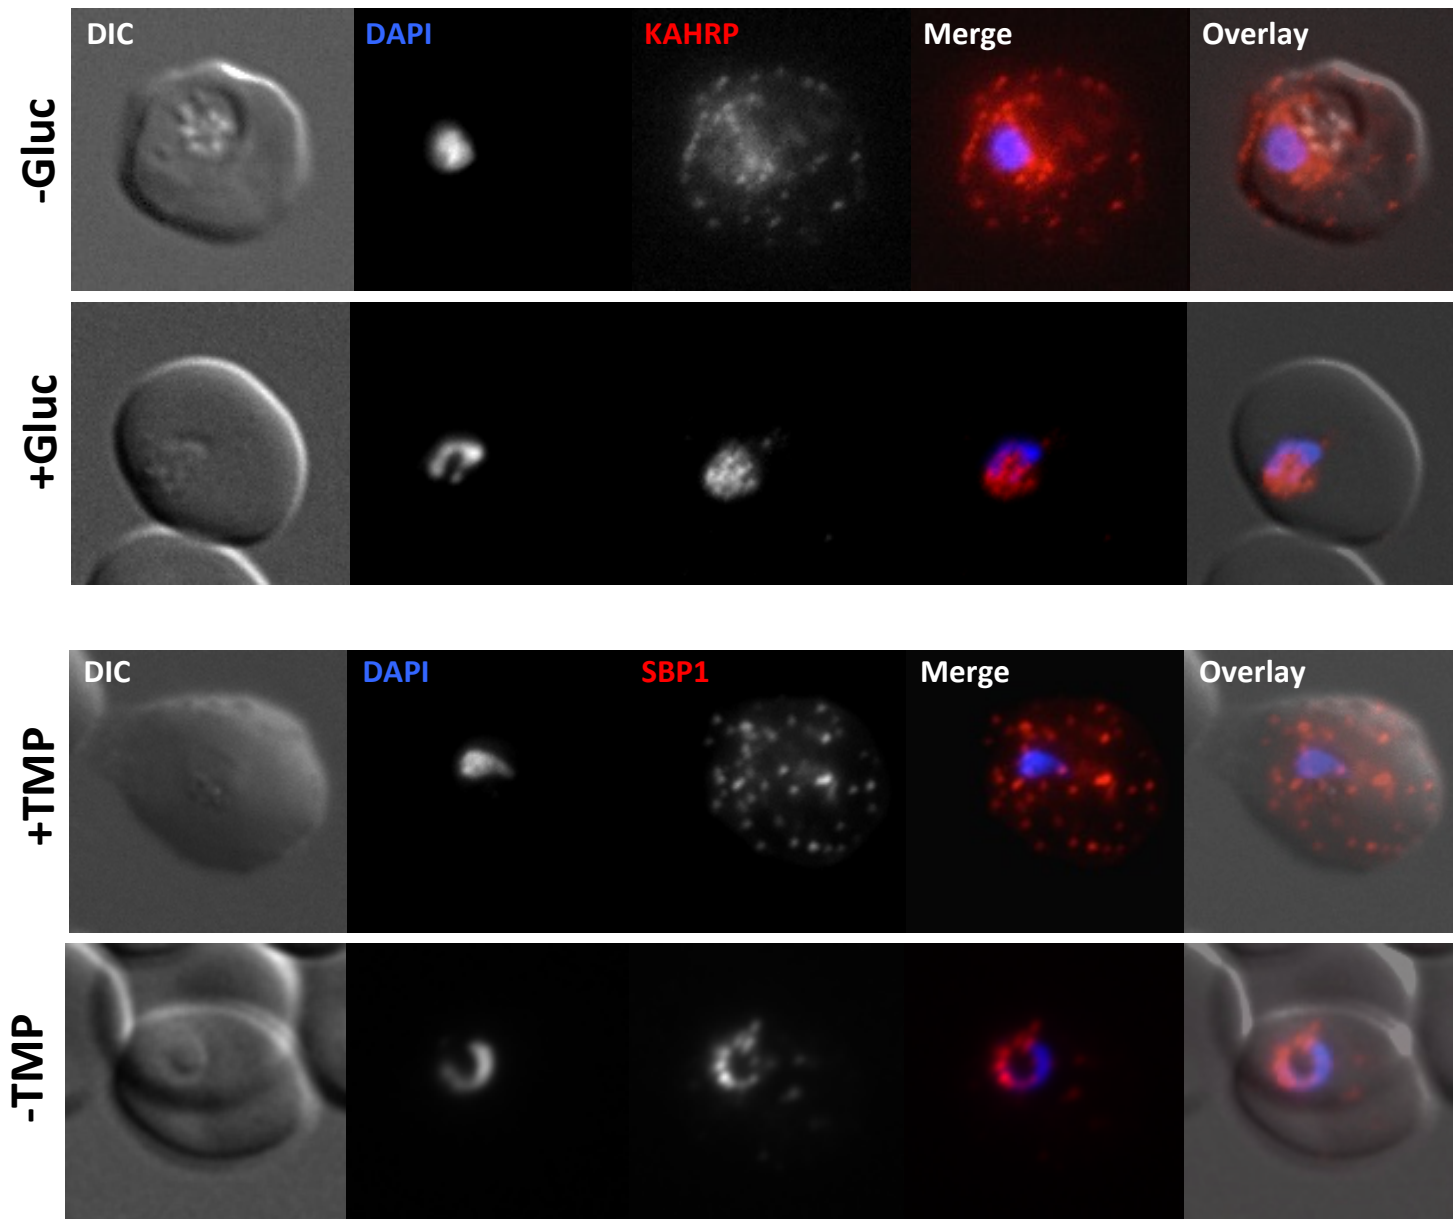

Supplementary Figure S1

**Supplementary Table S2: Oligonucleotides used in this study**

| Name                   | Sequence 5'→3'                                                   |
|------------------------|------------------------------------------------------------------|
| GFP1_10_oligo_F        | CTAGGATGAGTAAAGGAGAAGAAGCTTTTCACTGGAGGTAC                        |
| GFP1_10_oligo_R        | CTCCAGTGAAAAGTTCTTCTCCTTTACTCATC                                 |
| Hsp70x_Xho_F           | <u>ggctcgag</u> ATGAAGACAAAAATTTGTAGTTATATTC                     |
| Hs70x_40_A_R           | <u>ggcctagg</u> TAAATCAATACCAATTGCAACCTCTG                       |
| Hsp70x_FLP_All_R       | <u>ggcctagg</u> ACTATTATTAGCTTCTTCACTTGCTGTATGTACTGTTGTTGTTGC    |
| Hsp70x_E5/6D_All_R     | <u>ggcctagg</u> ACTGTCGTCAGCATTATTACTTGCTGTATGTACTGTTGTTGTTGC    |
| Hsp70x_E6A_All_R       | <u>ggcctagg</u> ACTAGCTTCAGCATTATTACTTGCTGTATGTACTGTTGTTGTTGC    |
| Hsp70x_E5/6K_All_R     | <u>ggcctagg</u> ACTTTTTTTAGCATTATTACTTGCTGTATGTACTGTTGTTGTTGC    |
| Hsp70x_N2/3A_All_R     | <u>ggcctagg</u> TGATTCTTCTGCAGCAGCACTTGCTGTATGTACTGTTGTTG        |
| Hsp70x_SCR_All_R       | <u>ggcctagg</u> TTCACCTTCACTATTAGCATTGCTGTATGTACTGTTGTTGTTGC     |
| Hsp70x_S1A_All_R       | <u>ggcctagg</u> ACTTTCTTCAGCATTATTAGCTGCTGTATGTACTGTTGTTGTTGC    |
| Hsp70x_S7A_All_R       | <u>ggcctagg</u> AGCTTCTTCAGCATTATTACTTGCTGTATGTACTGTTGTTGTTGC    |
| Sew_F_70x+STV          | CAACAGTACATACACATTATGAAAATTATC                                   |
| Sew_R_70x+STV          | GATAATTTTCATAATGTGTATGTACTGTTG                                   |
| stev <sup>AB0rev</sup> | <u>ggcctagg</u> TTTCTTTATTGCGTCTTCG                              |
| Pfa660w_70x_A_R        | <u>ggctcgag</u> ATGGCAACCTTAAGGAAAAGCTATGTACC                    |
| Pfa660w_70x_X_F        | <u>ggcctagg</u> TGATTCTTCTGCATTGTTACTTGACACAATTCAGTGAATTATTAAGGG |
| Flp_2NA_All_R          | <u>ggcctagg</u> ACTGGCTGCAGCTTCTTCACTTGCTGTATGTACTGTTGTTGTTGC    |
| Scr_2EA_All_R          | <u>ggcctagg</u> TGCACTAGCACTATTAGCATTGCTGTATGTACTGTTGTTGTTGC     |

Restriction sites underlined; coding regions in capital letters

| Construct | Reverse Primer     | Changed Export Motif |
|-----------|--------------------|----------------------|
| S1A       | Hsp70x_S1A_All_R   | <b>ANNAEES</b>       |
| S7A       | Hsp70x_S7A_All_R   | <b>SNNAEAA</b>       |
| E6A       | Hsp70x_E6A_All_R   | <b>SNNAEAS</b>       |
| E5/6K     | Hsp70x_E5/6K_All_R | <b>SNNAKKS</b>       |
| E5/6D     | Hsp70x_E5/6D_All_R | <b>SNNADDS</b>       |
| N2/3A     | Hsp70x_N2/3A_All_R | <b>SAAAEES</b>       |
| SCR       | Hsp70x_SCR_All_R   | <b>SESEAN</b>        |
| FLP       | Hsp70x_FLP_All_R   | <b>SEEANNS</b>       |
| FLP/2NA   | Flp_2NA_All_R      | <b>SEEANNS</b>       |
| SCR/2EA   | Scr_2EA_All_R      | <b>SESEAN</b>        |

Changes are highlighted in bold
